# Supplementary material for: Dynamics of water molecules and sodium ions in solid hydrates of nucleotides
Source: Royal Society of Chemistry journal article supplement (doi:10.1039/c4ce00727a), 2014-01-01
Supplement: c4ce00727a1.pdf [file c4ce00727a1.pdf]

Fractional coordinates of the geometry optimised UMP structure (starting point for MD simulation). Lattice parameters (Å): a = 22.880000, b = 8.877000, c = 19.592000; Cell Angles (degrees) alpha = 90.000000, beta = 90.000000, gamma = 90.000000

|   |                    |                    |                    |
|---|--------------------|--------------------|--------------------|
| H | 0.564027856638256  | 0.095552276844903  | 0.595624356207378  |
| H | 0.528440429245620  | 0.084129857628259  | 0.668159938013147  |
| H | 0.658523059865880  | -0.024902856625423 | 0.877971545204509  |
| H | 0.605974022860076  | 0.066022111660540  | 0.850880359950777  |
| H | 0.695860843724142  | 0.386249537177719  | 0.172930002764643  |
| H | 0.718387440774184  | 0.444832723308566  | 0.256327126906213  |
| H | 0.797988707725507  | 0.371724617211405  | 0.185047271988791  |
| H | 0.799171005855310  | 0.647026579374253  | 0.255047322839086  |
| H | 0.786545281483426  | 0.796689276347700  | 0.154416180404165  |
| H | 0.858943923271072  | 0.580954386450986  | 0.066800892444282  |
| H | 0.833347324343482  | 0.851527580294207  | -0.124620784260862 |
| H | 0.668320430927554  | 0.859641793062639  | -0.025290204587776 |
| H | 0.714032911562581  | 0.720663251757209  | 0.072107342552391  |
| H | 0.489264194457745  | 0.316151754581871  | 0.148480503625257  |
| H | 0.493285428104619  | 0.127346131914886  | 0.139546112329236  |
| H | 0.449588324717810  | 0.490109407737060  | 0.197230927218464  |
| H | 0.424555612789323  | 0.469866704132485  | 0.126373597689368  |
| H | 0.612170396791841  | 0.443563037951731  | 0.039397424518291  |
| H | 0.554387903594930  | 0.354402961677178  | 0.052396565227684  |
| H | 0.879046957922566  | 0.446749649030143  | 0.241782804588563  |
| H | 0.909181129164106  | 0.740205276434079  | 0.162710243265420  |
| H | 0.972750560259239  | 0.311916601624113  | 0.924648718769137  |
| H | 0.938851668716276  | 0.250477105012800  | 0.989754729796622  |
| H | 0.192849422002266  | -0.103683187061607 | 0.170563712077977  |
| H | 0.218687740095890  | -0.065740718619639 | 0.254905249974012  |
| H | 0.297605307413064  | -0.128791011513706 | 0.185552265135832  |
| H | 0.300715180320064  | 0.146728949637470  | 0.255819731225926  |
| H | 0.288500736958362  | 0.302127783850601  | 0.154643002252409  |
| H | 0.359258881422520  | 0.083060019761741  | 0.067152918349693  |
| H | 0.333654576340750  | 0.353742647318756  | -0.123902065153025 |
| H | 0.167395513296469  | 0.350518368822104  | -0.026873076202633 |
| H | 0.213633003870295  | 0.221462657765469  | 0.071746644114899  |
| H | -0.011457267431395 | -0.182016636801005 | 0.137454524983010  |
| H | -0.006087546785962 | -0.369422710921823 | 0.139679936316281  |
| H | 0.926097145897183  | -0.002751242024231 | 0.120906128717606  |
| H | 0.967781916523672  | -0.047550583201743 | 0.058049047590554  |
| H | 0.157722713182875  | -0.058557833380097 | 0.058193962224264  |
| H | 0.107504751254222  | -0.009283055758525 | 0.108915142492971  |
| H | 0.378001218470848  | -0.067033763485212 | 0.220228103383720  |
| H | 0.407671630991498  | 0.225020860313605  | 0.166801326152345  |
| H | 0.303974991231678  | 0.382646665637680  | 0.324983697635359  |
| H | 0.280606456938160  | 0.448201269574445  | 0.243172165739011  |
| H | 0.202191138256413  | 0.372077118365268  | 0.313546114263986  |
| H | 0.199981248180251  | 0.646900932047225  | 0.244741757698988  |
| H | 0.215044659956876  | 0.792193232948293  | 0.345888004022139  |
| H | 0.141131654662566  | 0.582919317523502  | 0.433440468839253  |
| H | 0.167202397481941  | 0.843064877140972  | 0.624658471703620  |
| H | 0.331955332517367  | 0.857246953159533  | 0.525622163055833  |
| H | 0.286156496716411  | 0.719582220315186  | 0.428250082073522  |
| H | 0.446810155578555  | 0.331878324346916  | 0.439658838394622  |
| H | 0.385209869725276  | 0.396986354566868  | 0.464939195461072  |
| H | 0.581681250057743  | 0.636001373244075  | 0.350583138512094  |
| H | 0.566390298470834  | 0.670165558026823  | 0.425946489149796  |
| H | 0.499731421142628  | 0.209286253286413  | 0.256487057104903  |
| H | 0.500945749970153  | 0.066267637673942  | 0.299349839979553  |
| H | 0.105810335397402  | 0.491785273088084  | 0.309438373998479  |
| H | 0.132689799523742  | 0.911376152362726  | 0.333927083507912  |
| H | 0.065155406581544  | 0.634480083396768  | 0.606380303311422  |
| H | 0.027390529125438  | 0.599883275459160  | 0.675695565740450  |

|   |                   |                   |                   |
|---|-------------------|-------------------|-------------------|
| H | 0.165084373067462 | 0.507561574003754 | 0.878654796487182 |
| H | 0.114012953839610 | 0.617814444612912 | 0.850951377672213 |
| H | 0.513630078728817 | 0.802350818318736 | 0.981023889101204 |
| H | 0.489343396818852 | 0.637492331256234 | 0.963628527329024 |
| H | 0.306798585681051 | 0.604113581171916 | 0.670162236665152 |
| H | 0.281640594753965 | 0.565715495924495 | 0.754913732165587 |
| H | 0.201653433557671 | 0.627644074496217 | 0.685006966607283 |
| H | 0.201570521779767 | 0.350851252156514 | 0.753821938217850 |
| H | 0.215002817939187 | 0.207461214319066 | 0.654088084933671 |
| H | 0.141327392031862 | 0.419412249243635 | 0.566297421243594 |
| H | 0.167089834411038 | 0.145913755771484 | 0.376245187936468 |
| H | 0.332638477846490 | 0.150310568605794 | 0.474464604752609 |
| H | 0.286404746461158 | 0.277669947700193 | 0.571773629353321 |
| H | 0.564755058408129 | 0.394920261478906 | 0.635565034167202 |
| H | 0.566168401003449 | 0.312339755443332 | 0.566869917958582 |
| H | 0.517524648424847 | 0.862504345082075 | 0.622725772474456 |
| H | 0.544555842531486 | 0.708226335703807 | 0.637679091002189 |
| H | 0.332172972002602 | 0.551255202265164 | 0.549094125478712 |
| H | 0.397954817332032 | 0.594213437696532 | 0.526601681097076 |
| H | 0.120438668265318 | 0.133807388319467 | 0.694293189077041 |
| H | 0.102491899455075 | 0.497163352434222 | 0.692932825176212 |
| H | 0.490436306081724 | 0.913226799411937 | 0.172047443656458 |
| H | 0.541416946299699 | 0.947868895944719 | 0.120929210282542 |
| H | 0.384226334993923 | 0.886519779554100 | 0.346369754274689 |
| H | 0.332017046296932 | 0.998063288137854 | 0.375110408476715 |
| H | 0.032995422245361 | 0.924231857853203 | 0.416293088077945 |
| H | 0.011381514220210 | 0.780506182429933 | 0.374431309761469 |
| H | 0.805285132778647 | 1.108773582833974 | 0.671200583890530 |
| H | 0.781392162068258 | 1.061390214721863 | 0.755624596951950 |
| H | 0.702120802168755 | 1.128027320108190 | 0.686194272015943 |
| H | 0.701085726240668 | 0.851578549561625 | 0.754391117232548 |
| H | 0.715122872817538 | 0.708512517126808 | 0.654192166659356 |
| H | 0.640852666575931 | 0.915560948911145 | 0.566135930127027 |
| H | 0.668548913416502 | 0.662013869428924 | 0.372181469959673 |
| H | 0.831718176831190 | 0.642750397086865 | 0.476169210451126 |
| H | 0.786777173475642 | 0.776707799509982 | 0.571664384061404 |
| H | 0.005842798512419 | 0.934663605561125 | 0.686463171434779 |
| H | 0.067258208239107 | 0.882514532325320 | 0.658545285563578 |
| H | 1.057684010619113 | 1.229418014002736 | 0.625428769412928 |
| H | 1.025068414755425 | 1.383531490638717 | 0.619784754233050 |
| H | 0.837173770993564 | 1.128402712270399 | 0.558825662694472 |
| H | 0.904872214318646 | 1.161097435308543 | 0.542868172058812 |
| H | 0.633018954471320 | 0.587346884414350 | 0.666924727454031 |
| H | 0.601589664436062 | 0.985094137405543 | 0.687843371650643 |
| H | 0.692828262271826 | 0.601416096079143 | 0.830474946594380 |
| H | 0.718465002548804 | 0.567585188436467 | 0.745376917832701 |
| H | 0.797840817449763 | 0.628466038755053 | 0.815217117724177 |
| H | 0.798245512706555 | 0.352550897042346 | 0.745564735993840 |
| H | 0.788491299053539 | 0.198143063856459 | 0.845511092435920 |
| H | 0.858839025338865 | 0.419885218325526 | 0.932938505577450 |
| H | 0.833708546923700 | 0.152498251355243 | 1.125297034062447 |
| H | 0.667126870931645 | 0.155903793303285 | 1.027102700012140 |
| H | 0.713846776423452 | 0.280919159907978 | 0.928430082133542 |
| H | 0.487546178121000 | 0.655917260986140 | 0.847942761693424 |
| H | 0.484869322787888 | 0.842333500321070 | 0.842214045643693 |
| H | 0.426315982814376 | 0.444747760178763 | 0.851976350353160 |
| H | 0.455931744792185 | 0.388535696851603 | 0.919830628947896 |
| H | 0.588931016880764 | 0.621474989033644 | 0.967415766991576 |
| H | 0.657448043499464 | 0.601412810925990 | 0.951504151243648 |
| H | 0.906904163434560 | 0.280514647267670 | 0.831601473955945 |
| H | 0.877028087472094 | 0.555976932354611 | 0.753910656243162 |
| H | 1.056240432605843 | 0.469549047148309 | 0.128503872495969 |
| H | 1.023014431046317 | 0.465724218374638 | 0.060129576736938 |

|   |                    |                    |                    |
|---|--------------------|--------------------|--------------------|
| H | 0.883692826211579  | 0.401208910475046  | 0.347105061831335  |
| H | 0.830758756665904  | 0.507862536019221  | 0.375222523345455  |
| H | 0.533194399949993  | 0.400695508254621  | 0.484689881266625  |
| H | 0.547712297524081  | 0.356214397063946  | 0.410223977430199  |
| H | 0.424664204138614  | 0.009943201242580  | 0.837471252403710  |
| H | 0.486026408026430  | 0.065677988593708  | 0.814896435415814  |
| H | 0.392108908412448  | 0.072329676044753  | 0.598512256915133  |
| H | 0.430526702379838  | 0.061046218377095  | 0.529234228348718  |
| H | -0.012150274484260 | 0.222483004827024  | 0.542512830985183  |
| H | -0.050220577156534 | 0.328407480732713  | 0.495408632836282  |
| H | 0.805822530512798  | -0.105415537999567 | 0.330091732015561  |
| H | 0.781936310551559  | -0.063716440282761 | 0.244776712658113  |
| H | 0.701639682976477  | -0.127579264942260 | 0.313585974105422  |
| H | 0.702761787811340  | 0.151091020412337  | 0.247309312668983  |
| H | 0.715584006515489  | 0.290224273335144  | 0.344908244283920  |
| H | 0.641114979982977  | 0.085966912441603  | 0.434578385388404  |
| H | 0.667260445763260  | 0.347107804385238  | 0.624700792746104  |
| H | 0.831380618248534  | 0.361193078550499  | 0.524913029975342  |
| H | 0.785709934065667  | 0.221887161847370  | 0.427603230519013  |
| H | 0.982279826825900  | -0.287424073104949 | 0.254235881400299  |
| H | 0.998429566148123  | -0.426142069836349 | 0.299882946518346  |
| H | 0.074111325285684  | 0.107603262423311  | 0.356539853485331  |
| H | 0.062075012971639  | 0.179926861634590  | 0.428057913096117  |
| H | 0.886028795729211  | -0.173554758156613 | 0.480891381874313  |
| H | 0.946853521790787  | -0.151480776230462 | 0.440875647023417  |
| H | 0.618849382531031  | 0.369447264112076  | 0.309638054676208  |
| H | 0.602033316020389  | 0.001605250673811  | 0.300498921691147  |
| H | 1.009227463332737  | 0.517897422454140  | 0.908307791046284  |
| H | 0.986614865048004  | 0.509654226570955  | 0.830856061472327  |
| H | 0.892377212784828  | 0.668785889884732  | 0.622433587651319  |
| H | 0.914554067446351  | 0.603742819542850  | 0.547860460120149  |
| H | 0.476908008196408  | 0.692549816207179  | 0.548967715906237  |
| H | 0.452272240844095  | 0.795187608115448  | 0.489333572792568  |
| H | 0.580265357220432  | -0.065290554363845 | 0.422989075057832  |
| H | 0.558697207053265  | 0.099688792238388  | 0.399292467004595  |
| H | 0.656045231359852  | -0.001198674128552 | 0.116861232146986  |
| H | 0.613532453203877  | 0.006567834642055  | 0.053300074300083  |
| H | 0.969841166944712  | 0.884011314191637  | -0.053600925592187 |
| H | 0.944350557234079  | 0.758559623083965  | -0.008606551288593 |
| H | 0.194083384827982  | 1.108251242682637  | 0.828296508570894  |
| H | 0.219001657879793  | 1.060049715917451  | 0.744254406569621  |
| H | 0.297330397791008  | 1.128815423871440  | 0.813843565537983  |
| H | 0.300277301784026  | 0.852602301579011  | 0.744573418286705  |
| H | 0.285873325242846  | 0.706063624707555  | 0.844759880858794  |
| H | 0.359242186415518  | 0.915122711627980  | 0.934135522431664  |
| H | 0.332409589349284  | 0.662063343168637  | 1.126318809249800  |
| H | 0.168324063409032  | 0.643004838831236  | 1.023177958968558  |
| H | 0.213852162484194  | 0.777812948263725  | 0.927944358539597  |
| H | -0.020364503773907 | 1.122154776337258  | 0.760727783657438  |
| H | 0.006342470327469  | 1.238055667255964  | 0.708988752756372  |
| H | 0.923209788151330  | 0.949973987588140  | 0.851231755511967  |
| H | 0.950697442287517  | 1.078132986115371  | 0.901255356183507  |
| H | 0.099869499772079  | 1.103395068591862  | 0.990772633292782  |
| H | 0.042658555334692  | 1.183972835364303  | 0.963452005908768  |
| H | 0.408659474821290  | 0.753205116882375  | 0.844701924657730  |
| H | 0.375895144186406  | 1.058844255489106  | 0.749298273362619  |
| H | 0.069975916228993  | 0.466857082035998  | 0.457983062154131  |
| H | 0.050807633587272  | 0.638119611500318  | 0.445707551032602  |
| H | 0.155555210019155  | 0.570164652623306  | 0.131409485898166  |
| H | 0.103295512611594  | 0.625110535037401  | 0.082593443079455  |
| H | 0.505899558840369  | 0.163745699944393  | -0.004738936758346 |
| H | 0.455727175693723  | 0.273758667517496  | 0.007250789355054  |
| H | 0.476980175986854  | 0.997523712884827  | 0.935982666611127  |

|   |                    |                    |                    |
|---|--------------------|--------------------|--------------------|
| H | 0.460221507694558  | 0.957711662265094  | 1.014904618331969  |
| H | 0.085709288614365  | 0.577420803025819  | 0.953011841933211  |
| H | 0.035930662263029  | 0.689716079879367  | 0.988097565458745  |
| H | 0.490265334630307  | -0.024202921122789 | 0.439382222767939  |
| H | 0.419507808214401  | -0.028347754308790 | 0.430422012480668  |
| H | 0.978856360723223  | 0.514401893918478  | 0.464824252290823  |
| H | 0.910880670185649  | 0.492586387308037  | 0.441477346292435  |
| H | 0.536444827819541  | 0.196654535891375  | 0.759711782354057  |
| H | 0.464716695961394  | 0.189647647052064  | 0.731613159188970  |
| H | 0.028005586566562  | 0.689988970792314  | 0.775221666596599  |
| H | -0.039350913173901 | 0.672153965227026  | 0.743755198322089  |
| H | 0.534413381130690  | 0.816344359611919  | 0.240793539843042  |
| H | 0.468566224443314  | 0.818750437708721  | 0.274165032531691  |
| H | 0.041955639050904  | 0.346792512135814  | 0.260188144515627  |
| H | -0.027842704323683 | 0.336341725241435  | 0.283887693955546  |
| C | 0.718006993006993  | 0.476174383237580  | 0.201919150673744  |
| C | 0.778496503496504  | 0.484623183507942  | 0.177776643527971  |
| C | 0.819187062937063  | 0.598738312492959  | 0.208707635769702  |
| C | 0.823994755244755  | 0.718823927002366  | 0.150214373213557  |
| C | 0.817220279720280  | 0.625999774698659  | 0.085596161698653  |
| C | 0.828321678321678  | 0.743945026472907  | -0.027409146590445 |
| C | 0.750087412587413  | 0.870226427847246  | -0.081206614944875 |
| C | 0.713505244755245  | 0.822913146333221  | -0.026592486729277 |
| C | 0.739510489510490  | 0.752731778754084  | 0.027000816659861  |
| C | 0.218006993006993  | -0.023769291427284 | 0.201919150673744  |
| C | 0.278496503496504  | -0.015433141827194 | 0.177776643527971  |
| C | 0.319187062937063  | 0.098681987157824  | 0.208707635769702  |
| C | 0.323994755244755  | 0.218767601667230  | 0.150214373213557  |
| C | 0.317220279720280  | 0.126056100033795  | 0.085596161698653  |
| C | 0.328321678321678  | 0.244001351808043  | -0.027409146590445 |
| C | 0.250087412587413  | 0.370170102512110  | -0.081206614944875 |
| C | 0.213505244755245  | 0.322856820998085  | -0.026592486729277 |
| C | 0.239510489510490  | 0.252675453418948  | 0.027000816659861  |
| C | 0.281993006993007  | 0.476174383237580  | 0.298080849326256  |
| C | 0.221503496503496  | 0.484623183507942  | 0.322223356472029  |
| C | 0.180812937062937  | 0.598738312492959  | 0.291292364230298  |
| C | 0.176005244755245  | 0.718823927002366  | 0.349785626786443  |
| C | 0.182779720279720  | 0.625999774698659  | 0.414403838301347  |
| C | 0.171678321678322  | 0.743945026472907  | 0.527409146590445  |
| C | 0.249912587412587  | 0.870226427847245  | 0.581206614944875  |
| C | 0.286494755244755  | 0.822913146333220  | 0.526592486729277  |
| C | 0.260489510489510  | 0.752731778754084  | 0.472999183340139  |
| C | 0.281993006993007  | 0.523825616762420  | 0.701919150673744  |
| C | 0.221503496503496  | 0.515376816492058  | 0.677776643527970  |
| C | 0.180812937062937  | 0.401261687507041  | 0.708707635769702  |
| C | 0.176005244755245  | 0.281176072997634  | 0.650214373213556  |
| C | 0.182779720279720  | 0.374000225301340  | 0.585596161698652  |
| C | 0.171678321678322  | 0.256054973527092  | 0.472590853409555  |
| C | 0.249912587412587  | 0.129773572152754  | 0.418793385055124  |
| C | 0.286494755244755  | 0.177086853666779  | 0.473407513270723  |
| C | 0.260489510489510  | 0.247268221245916  | 0.527000816659861  |
| C | 0.781993006993007  | 1.023769291427284  | 0.701919150673744  |
| C | 0.721503496503496  | 1.015433141827194  | 0.677776643527970  |
| C | 0.680812937062937  | 0.901318012842176  | 0.708707635769702  |
| C | 0.676005244755245  | 0.781232398332770  | 0.650214373213556  |
| C | 0.682779720279720  | 0.873943899966205  | 0.585596161698652  |
| C | 0.671678321678322  | 0.755998648191957  | 0.472590853409555  |
| C | 0.749912587412587  | 0.629829897487890  | 0.418793385055124  |
| C | 0.786494755244755  | 0.677143179001915  | 0.473407513270723  |
| C | 0.760489510489510  | 0.747324546581052  | 0.527000816659861  |
| C | 0.718006993006993  | 0.523825616762420  | 0.798080849326256  |
| C | 0.778496503496504  | 0.515376816492058  | 0.822223356472029  |
| C | 0.819187062937063  | 0.401261687507040  | 0.791292364230298  |

|   |                   |                    |                    |
|---|-------------------|--------------------|--------------------|
| C | 0.823994755244755 | 0.281176072997634  | 0.849785626786443  |
| C | 0.817220279720280 | 0.374000225301340  | 0.914403838301347  |
| C | 0.828321678321678 | 0.256054973527092  | 1.027409146590445  |
| C | 0.750087412587413 | 0.129773572152754  | 1.081206614944875  |
| C | 0.713505244755245 | 0.177086853666779  | 1.026592486729277  |
| C | 0.739510489510490 | 0.247268221245916  | 0.972999183340139  |
| C | 0.781993006993007 | -0.023769291427284 | 0.298080849326256  |
| C | 0.721503496503496 | -0.015433141827194 | 0.322223356472029  |
| C | 0.680812937062937 | 0.098681987157824  | 0.291292364230298  |
| C | 0.676005244755245 | 0.218767601667230  | 0.349785626786443  |
| C | 0.682779720279720 | 0.126056100033795  | 0.414403838301347  |
| C | 0.671678321678322 | 0.244001351808043  | 0.527409146590445  |
| C | 0.749912587412587 | 0.370170102512110  | 0.581206614944875  |
| C | 0.786494755244755 | 0.322856820998085  | 0.526592486729277  |
| C | 0.760489510489510 | 0.252675453418948  | 0.472999183340139  |
| C | 0.218006993006993 | 1.023769291427284  | 0.798080849326256  |
| C | 0.278496503496503 | 1.015433141827194  | 0.822223356472029  |
| C | 0.319187062937063 | 0.901318012842176  | 0.791292364230298  |
| C | 0.323994755244755 | 0.781232398332770  | 0.849785626786443  |
| C | 0.317220279720280 | 0.873943899966205  | 0.914403838301347  |
| C | 0.328321678321678 | 0.755998648191957  | 1.027409146590445  |
| C | 0.250087412587413 | 0.629829897487890  | 1.081206614944875  |
| C | 0.213505244755245 | 0.677143179001915  | 1.026592486729277  |
| C | 0.239510489510489 | 0.747324546581052  | 0.972999183340139  |
| N | 0.792089160839161 | 0.716570913596936  | 0.027409146590445  |
| N | 0.806993006993007 | 0.830798693252225  | -0.079624336463863 |
| N | 0.292089160839161 | 0.216627238932072  | 0.027409146590445  |
| N | 0.306993006993007 | 0.330855018587361  | -0.079624336463863 |
| N | 0.207910839160839 | 0.716570913596936  | 0.472590853409555  |
| N | 0.193006993006993 | 0.830798693252225  | 0.579624336463863  |
| N | 0.207910839160839 | 0.283429086403064  | 0.527409146590445  |
| N | 0.193006993006993 | 0.169201306747775  | 0.420375663536137  |
| N | 0.707910839160839 | 0.783372761067928  | 0.527409146590445  |
| N | 0.693006993006993 | 0.669144981412639  | 0.420375663536137  |
| N | 0.792089160839161 | 0.283429086403064  | 0.972590853409555  |
| N | 0.806993006993007 | 0.169201306747775  | 1.079624336463863  |
| N | 0.707910839160839 | 0.216627238932072  | 0.472590853409555  |
| N | 0.693006993006993 | 0.330855018587360  | 0.579624336463863  |
| N | 0.292089160839161 | 0.783372761067928  | 0.972590853409555  |
| N | 0.306993006993007 | 0.669144981412639  | 1.079624336463863  |
| O | 0.550908609560408 | 0.026715750927568  | 0.631623952829159  |
| O | 0.614686781784937 | -0.020777398013609 | 0.881253780154827  |
| O | 0.503665266603496 | 0.217843133685065  | 0.167070056718544  |
| O | 0.462538484755830 | 0.490262088295642  | 0.147856986897438  |
| O | 0.586415107098002 | 0.729279688477318  | 0.192652452518905  |
| O | 0.603948082861752 | 0.463412570483435  | 0.239362415675421  |
| O | 0.638226358373692 | 0.689360207963797  | 0.303990747722194  |
| O | 0.687242828679036 | 0.615912696017678  | 0.191844531627703  |
| O | 0.877435787981531 | 0.549541542577762  | 0.221947185880014  |
| O | 0.875184118842325 | 0.805055127762072  | 0.151160131069967  |
| O | 0.777010925622799 | 0.510806274964287  | 0.102571406024552  |
| O | 0.878687669616484 | 0.690178725233548  | -0.030430668779159 |
| O | 0.731197356417102 | 0.948868123135591  | -0.130670998413722 |
| O | 0.588411933006622 | 0.399105239535153  | 0.076276725063524  |
| O | 0.971218417589141 | 0.225844267290135  | 0.957501857432058  |
| O | 0.098151134068274 | 0.275343569681272  | 0.218122483049204  |
| O | 0.092463673916255 | -0.001259833074969 | 0.196278120506293  |
| O | 0.132037859202191 | 0.089845347733750  | 0.309295847567936  |
| O | 0.190425473956893 | 0.123670583813437  | 0.200970335400252  |
| O | 0.377103682254672 | 0.044159039290762  | 0.220638209718320  |
| O | 0.377678127743334 | 0.295272193181607  | 0.149367627572974  |
| O | 0.277519051148805 | 0.008982673150199  | 0.102466348916071  |
| O | 0.380777314877162 | 0.202800177579549  | -0.026722969611199 |

|   |                    |                    |                    |
|---|--------------------|--------------------|--------------------|
| ○ | 0.231367780508418  | 0.447452634474821  | -0.131281153087084 |
| ○ | -0.010881578297432 | -0.274609181587998 | 0.166294563131603  |
| ○ | 0.118540556255458  | -0.015033761862272 | 0.059224780901461  |
| ○ | 0.966859002193749  | -0.000827460454505 | 0.104401479827046  |
| ○ | 0.495780123651019  | 0.176382951497755  | 0.304666861946781  |
| ○ | 0.553131651475943  | 0.607705671220273  | 0.387545770784684  |
| ○ | 0.407955801619589  | 0.741680891529627  | 0.310439702113312  |
| ○ | 0.406054486383785  | 0.475007150711589  | 0.269302602659873  |
| ○ | 0.360344718750747  | 0.687539309798925  | 0.197477348038343  |
| ○ | 0.313858609205927  | 0.611775501556895  | 0.309491169140732  |
| ○ | 0.124871719069063  | 0.546787376747598  | 0.272237671976998  |
| ○ | 0.124396840883107  | 0.805121047485072  | 0.349118697597570  |
| ○ | 0.222376013537144  | 0.509583865206246  | 0.397216501288468  |
| ○ | 0.120613800340271  | 0.693219239360591  | 0.529595974372241  |
| ○ | 0.268577406932301  | 0.947679419649113  | 0.630727870662509  |
| ○ | 0.406271055427706  | 0.357216958218555  | 0.424449122460719  |
| ○ | 0.049577150621408  | 0.554813514614042  | 0.636262846863310  |
| ○ | 0.122066374052568  | 0.531905498580802  | 0.883104256441880  |
| ○ | 0.522597121737508  | 0.690380122653238  | 0.984391614450327  |
| ○ | 0.370450427213158  | 0.507866677206321  | 0.539015669252077  |
| ○ | 0.505709749634061  | 0.755076911026998  | 0.630890701714462  |
| ○ | 0.540396448906931  | 0.379172837159926  | 0.594101527851071  |
| ○ | 0.396200602578004  | 0.216585225201593  | 0.711686506973325  |
| ○ | 0.411527083344709  | 0.496234389206133  | 0.700672314763895  |
| ○ | 0.370230397385116  | 0.384706644284564  | 0.809940344426458  |
| ○ | 0.310355242539642  | 0.379560819164982  | 0.700035171772723  |
| ○ | 0.125552921591608  | 0.452009019634970  | 0.731238649599356  |
| ○ | 0.124662313434563  | 0.192098054359486  | 0.650371573532756  |
| ○ | 0.223186169814359  | 0.488051061320084  | 0.602696352127457  |
| ○ | 0.120007280561125  | 0.303991591467956  | 0.470669627785823  |
| ○ | 0.267221315023085  | 0.049684334152054  | 0.368722087775662  |
| ○ | 0.498229217846626  | 0.934415535698515  | 0.121812458402871  |
| ○ | 0.375741250131286  | 0.980102218111455  | 0.374485587860745  |
| ○ | 0.012899204610748  | 0.824812953737704  | 0.421485658001755  |
| ○ | 0.894591519420429  | 0.714036165080435  | 0.713862363294791  |
| ○ | 0.914655037282846  | 0.993255358485026  | 0.702831188347807  |
| ○ | 0.867563705514945  | 0.889737582299956  | 0.809360724499902  |
| ○ | 0.811587517767093  | 0.882526283401031  | 0.696934607805262  |
| ○ | 0.625501026302223  | 0.955363581297456  | 0.728594596220266  |
| ○ | 0.624758994098684  | 0.690578423896280  | 0.649761189049420  |
| ○ | 0.722061629323606  | 0.990994100321099  | 0.602651519662303  |
| ○ | 0.619956448747446  | 0.803440340085087  | 0.472587057123627  |
| ○ | 0.767427960401811  | 0.554054030579325  | 0.367492980036314  |
| ○ | 0.876402447762190  | 1.117586515278826  | 0.578024379931201  |
| ○ | 1.017094959273586  | 1.272001204663147  | 0.620791504744242  |
| ○ | 0.026863250551236  | 0.910954929598260  | 0.644233022221976  |
| ○ | 0.620723575112413  | 0.546558212439456  | 0.957700345541248  |
| ○ | 0.491344623399124  | 0.743814477859119  | 0.817503009781802  |
| ○ | 0.461204819007576  | 0.464362260479170  | 0.883860812271706  |
| ○ | 0.595614763601954  | 0.237984885689418  | 0.799015666194049  |
| ○ | 0.595844598615710  | 0.518881863097792  | 0.791357820891152  |
| ○ | 0.629528923591958  | 0.374471339357772  | 0.689491981625772  |
| ○ | 0.690440582849397  | 0.377021834055142  | 0.798963171341453  |
| ○ | 0.876506113731034  | 0.451436908914633  | 0.775244364545564  |
| ○ | 0.878015014545900  | 0.204451001927447  | 0.846408785503829  |
| ○ | 0.776589245572936  | 0.488717200506520  | 0.897233021057195  |
| ○ | 0.879360841365356  | 0.306308675981562  | 1.030112181745882  |
| ○ | 0.730603759575402  | 0.049713432758078  | 1.130126266122456  |
| ○ | 1.016969188348968  | 0.443903926137325  | 0.109108017499787  |
| ○ | 0.874914719460566  | 0.490976280926999  | 0.377371584136934  |
| ○ | 0.521204500105533  | 0.331500263434142  | 0.448427809896829  |
| ○ | 0.465470648709852  | 0.017941595744481  | 0.855638216703376  |
| ○ | 0.411751448919290  | 0.130861855473117  | 0.563149140247348  |

|    |                    |                    |                    |
|----|--------------------|--------------------|--------------------|
| O  | -0.040371587104060 | 0.215918670056073  | 0.503504420438025  |
| O  | 0.901010037178605  | 0.270608895218393  | 0.298328144756210  |
| O  | 0.908380659199409  | -0.010752685108550 | 0.291625876692694  |
| O  | 0.868841902408198  | 0.138184391968127  | 0.190914335146680  |
| O  | 0.810623398022139  | 0.120268028852859  | 0.302191437821296  |
| O  | 0.627035544134274  | 0.045837822259735  | 0.264795492591955  |
| O  | 0.624629628489738  | 0.306053046041249  | 0.352563140319531  |
| O  | 0.721577013041960  | 0.008027649404211  | 0.397747279580371  |
| O  | 0.620313941333589  | 0.193835175672971  | 0.529236974277555  |
| O  | 0.768833234444889  | 0.444453884085133  | 0.631515746460696  |
| O  | 0.989739094417561  | -0.314254648189048 | 0.302718818403170  |
| O  | 0.904351677332354  | -0.116419377909296 | 0.443909584045919  |
| O  | 0.044476522523971  | 0.110677919605068  | 0.394515755467990  |
| O  | 0.994438284728514  | 0.449076528151051  | 0.873074498034247  |
| O  | 0.895813127840869  | 0.689338004854838  | 0.572705125886999  |
| O  | 0.453911804880662  | 0.685389969165695  | 0.505957668073260  |
| O  | 0.552281958597653  | -0.009155558253091 | 0.394014043278405  |
| O  | 0.613743853431919  | 0.004520675244212  | 0.103058520838589  |
| O  | 0.979482904829047  | 0.824860137564311  | -0.010423720139408 |
| O  | 0.088873913537137  | 0.768168606260086  | 0.811643557259897  |
| O  | 0.101397366687852  | 1.035572369955338  | 0.770942265429403  |
| O  | 0.131580676297378  | 0.821158297901777  | 0.694463438401253  |
| O  | 0.188671319278189  | 0.879839436361989  | 0.803892447794938  |
| O  | 0.376543943277572  | 0.958829396749836  | 0.776061499497390  |
| O  | 0.373740140203702  | 0.689831255893767  | 0.848782710384499  |
| O  | 0.278550377345553  | 0.992370204780609  | 0.897486640026772  |
| O  | 0.379682266377459  | 0.803594845851253  | 1.028769567158146  |
| O  | 0.230614429944115  | 0.554793635552543  | 1.131571083839136  |
| O  | 0.082751893558241  | 1.151504949944687  | 0.949358516109718  |
| O  | -0.008691898768036 | 1.228429043149383  | 0.756602723122083  |
| O  | 0.959009909281240  | 0.979203913547186  | 0.879203808015689  |
| O  | 0.041706020934074  | 0.532048417634052  | 0.434348168713975  |
| O  | 0.113475325083581  | 0.602776117004744  | 0.130406945320496  |
| O  | 0.498397019373584  | 0.274802120029307  | -0.000733131917923 |
| O  | 0.492764352953908  | 0.974861073447910  | 0.983000269228452  |
| O  | 0.058321713060490  | 0.593804413073026  | 0.992967829465850  |
| O  | 0.452968292367924  | -0.042041465975315 | 0.465304909506334  |
| O  | 0.938102351758339  | 0.491139093130417  | 0.483473084622859  |
| O  | 0.502856682508428  | 0.134088285124113  | 0.740610026501674  |
| O  | -0.001726954327792 | 0.619107147165319  | 0.755655458672168  |
| O  | 0.499517270261985  | 0.881003260605070  | 0.251639151953958  |
| O  | 0.006556346864578  | 0.402760531279629  | 0.276562052116644  |
| Na | 0.527345188438492  | 0.662722951668926  | 0.108993444684660  |
| Na | 0.600453063676170  | 0.243542669244135  | 0.177964220597784  |
| Na | 0.011615660157747  | 0.200913795409087  | 0.156587904451102  |
| Na | 0.079629522773226  | -0.244797390531872 | 0.225320451723428  |
| Na | 0.401029640887100  | 0.223784441159695  | 0.323144965017916  |
| Na | 0.456656589723354  | 0.577369806392608  | 0.383053901649400  |
| Na | 0.437743832997994  | 0.356718092542379  | 0.605171410782055  |
| Na | 0.436931002411972  | 0.731351724384193  | 0.716635904406962  |
| Na | 0.941481054856012  | 0.913963729653907  | 0.589029882379759  |
| Na | 0.902928708515364  | 1.247500105511952  | 0.685213600902802  |
| Na | 0.591358403101207  | 0.773648729656658  | 0.803500410190542  |
| Na | 0.558665644877563  | 0.396150933330939  | 0.887672402371092  |
| Na | 0.943311509421074  | 0.111010300658292  | 0.391505437128939  |
| Na | 0.894219184240624  | -0.258731987606959 | 0.325999670727594  |
| Na | 0.056714265389052  | 0.956757859406581  | 0.878993665439641  |
| Na | 0.077067774623032  | 1.313763341084607  | 0.822855898778789  |
| P  | 0.624912587412587  | 0.625549172017574  | 0.232799101674153  |
| P  | 0.124912587412587  | 0.125605497352709  | 0.232799101674153  |
| P  | 0.375087412587413  | 0.625549172017573  | 0.267200898325847  |
| P  | 0.375087412587413  | 0.374450827982426  | 0.732799101674153  |
| P  | 0.875087412587413  | 0.874394502647290  | 0.732799101674153  |

|   |                   |                   |                   |
|---|-------------------|-------------------|-------------------|
| P | 0.624912587412587 | 0.374450827982426 | 0.767200898325847 |
| P | 0.875087412587413 | 0.125605497352709 | 0.267200898325847 |
| P | 0.124912587412587 | 0.874394502647290 | 0.767200898325847 |
