# Supplementary material for: Dynamics of water molecules and sodium ions in solid hydrates of nucleotides
Source: Royal Society of Chemistry journal article supplement (doi:10.1039/c4ce00727a), 2014-01-01
Supplement: c4ce00727a2.pdf [file c4ce00727a2.pdf]

# FIN

Table 1 Crystal data and structure refinement for FIN.

|                                             |                                                                                  |
|---------------------------------------------|----------------------------------------------------------------------------------|
| Identification code                         | FIN                                                                              |
| Empirical formula                           | C <sub>10</sub> H <sub>26</sub> N <sub>5</sub> Na <sub>2</sub> O <sub>15</sub> P |
| Formula weight                              | 533.31                                                                           |
| Temperature/K                               | 293(2)                                                                           |
| Crystal system                              | orthorhombic                                                                     |
| Space group                                 | P2 <sub>1</sub> 2 <sub>1</sub> 2 <sub>1</sub>                                    |
| a/Å                                         | 9.0139(3)                                                                        |
| b/Å                                         | 21.2524(8)                                                                       |
| c/Å                                         | 22.2753(8)                                                                       |
| α/°                                         | 90.00                                                                            |
| β/°                                         | 90.00                                                                            |
| γ/°                                         | 90.00                                                                            |
| Volume/Å <sup>3</sup>                       | 4267.2(3)                                                                        |
| Z                                           | 8                                                                                |
| ρ <sub>calc</sub> /mg/mm <sup>3</sup>       | 1.660                                                                            |
| m/mm <sup>-1</sup>                          | 0.255                                                                            |
| F(000)                                      | 2224.0                                                                           |
| Crystal size/mm <sup>3</sup>                | 0.319 × 0.229 × 0.0549                                                           |
| Radiation                                   | MoKα (λ = 0.71073)                                                               |
| 2θ range for data collection                | 5.24 to 53.98°                                                                   |
| Index ranges                                | -9 ≤ h ≤ 11, -27 ≤ k ≤ 25, -28 ≤ l ≤ 28                                          |
| Reflections collected                       | 26750                                                                            |
| Independent reflections                     | 9320 [R <sub>int</sub> = 0.1005, R <sub>sigma</sub> = 0.1267]                    |
| Data/restraints/parameters                  | 9320/15/609                                                                      |
| Goodness-of-fit on F <sup>2</sup>           | 1.029                                                                            |
| Final R indexes [I ≥ 2σ (I)]                | R <sub>1</sub> = 0.0794, wR <sub>2</sub> = 0.1792                                |
| Final R indexes [all data]                  | R <sub>1</sub> = 0.1160, wR <sub>2</sub> = 0.2118                                |
| Largest diff. peak/hole / e Å <sup>-3</sup> | 1.13/-0.98                                                                       |
| Flack parameter                             | 0.2(2)                                                                           |

Table 2 Fractional Atomic Coordinates (×10<sup>4</sup>) and Equivalent Isotropic Displacement Parameters (Å<sup>2</sup>×10<sup>3</sup>) for FIN. U<sub>eq</sub> is defined as 1/3 of the trace of the orthogonalised U<sub>ij</sub> tensor.

| Atom | x       | y         | z         | U(eq)    |
|------|---------|-----------|-----------|----------|
| P1   | 3899(2) | 5125.6(9) | 6271.0(8) | 13.6(4)  |
| O1   | 2507(6) | 4267(2)   | 7964(2)   | 16.7(12) |
| O2   | 6611(7) | 1689(3)   | 7446(3)   | 25.4(14) |
| O3   | 5665(6) | 4662(3)   | 8843(2)   | 18.6(12) |
| O4   | 3081(6) | 5295(3)   | 8938(2)   | 17.8(12) |
| O5   | 3823(6) | 5030(3)   | 6998(2)   | 16.4(12) |
| O6   | 5534(6) | 5105(3)   | 6138(2)   | 18.4(12) |
| O7   | 3043(6) | 4596(3)   | 5981(2)   | 18.2(12) |

|     |           |            |             |          |
|-----|-----------|------------|-------------|----------|
| O8  | 3202(6)   | 5762(3)    | 6145(2)     | 17.8(12) |
| N1  | 4515(8)   | 3584(3)    | 7977(3)     | 17.5(14) |
| N2  | 5608(9)   | 3071(3)    | 7216(3)     | 23.8(16) |
| N3  | 5707(7)   | 1843(3)    | 8378(3)     | 16.4(14) |
| N4  | 4533(8)   | 2771(3)    | 8750(3)     | 17.4(15) |
| N5  | 4735(9)   | 1878(3)    | 9334(3)     | 25.8(17) |
| C1  | 4995(10)  | 3589(4)    | 7393(4)     | 22.2(19) |
| C2  | 5531(9)   | 2677(4)    | 7715(3)     | 16.3(17) |
| C3  | 5987(10)  | 2059(4)    | 7799(4)     | 20.5(18) |
| C4  | 4958(9)   | 2188(3)    | 8815(3)     | 14.9(16) |
| C5  | 4839(9)   | 2993(4)    | 8194(3)     | 16.7(17) |
| C6  | 3801(9)   | 4096(4)    | 8293(3)     | 13.9(15) |
| C7  | 4742(9)   | 4698(4)    | 8329(3)     | 16.5(17) |
| C8  | 3592(9)   | 5210(4)    | 8331(3)     | 16.6(17) |
| C9  | 2367(10)  | 4940(4)    | 7926(3)     | 16.3(17) |
| C10 | 2418(9)   | 5154(4)    | 7276(3)     | 16.4(16) |
| P2  | 8903(2)   | 5936.9(9)  | 8860.0(8)   | 14.1(4)  |
| O21 | 7535(6)   | 6842(2)    | 7210(2)     | 17.6(12) |
| O22 | 11794(7)  | 9416(3)    | 7463(3)     | 24.8(14) |
| O23 | 10583(6)  | 6381(3)    | 6293(2)     | 20.1(13) |
| O24 | 7941(7)   | 5823(3)    | 6228(2)     | 22.6(13) |
| O25 | 8798(6)   | 6046(2)    | 8145(2)     | 13.9(11) |
| O26 | 10532(6)  | 5983(3)    | 8986(2)     | 16.4(12) |
| O27 | 8002(6)   | 6457(3)    | 9154(2)     | 18.1(12) |
| O28 | 8280(6)   | 5291(3)    | 8983(2)     | 17.1(12) |
| N24 | 9521(8)   | 8244(3)    | 6292(3)     | 17.0(14) |
| N31 | 9575(8)   | 7505(3)    | 7121(3)     | 15.3(14) |
| N38 | 10754(7)  | 9195(3)    | 6562(3)     | 16.1(14) |
| N44 | 9587(8)   | 9087(4)    | 5638(3)     | 23.8(17) |
| N53 | 10749(8)  | 8076(3)    | 7823(3)     | 19.9(15) |
| C21 | 10127(10) | 7540(4)    | 7700(3)     | 20.2(18) |
| C22 | 10639(9)  | 8420(4)    | 7297(3)     | 15.6(17) |
| C23 | 11132(9)  | 9027(4)    | 7151(3)     | 17.6(17) |
| C24 | 9937(9)   | 8825(4)    | 6175(4)     | 16.9(17) |
| C25 | 9902(8)   | 8074(4)    | 6860(3)     | 14.2(16) |
| C26 | 8803(9)   | 6982(4)    | 6845(3)     | 14.6(16) |
| C27 | 9699(9)   | 6369(4)    | 6818(3)     | 14.2(16) |
| C28 | 8484(10)  | 5876(4)    | 6818(3)     | 19.7(18) |
| C29 | 7313(9)   | 6168(4)    | 7239(3)     | 14.1(16) |
| C30 | 7359(9)   | 5950(4)    | 7885(3)     | 17.1(17) |
| Na1 | 5903(4)   | 5792.4(15) | 10502.8(13) | 20.3(7)  |
| Na2 | 8474(4)   | 7976.8(15) | 10374.5(14) | 19.4(7)  |
| Na3 | 7202(4)   | 3071.9(15) | 6350.3(13)  | 19.0(7)  |
| Na4 | 5541(4)   | 4121.1(15) | 10385.5(14) | 22.9(8)  |
| O1W | 9132(7)   | 8748(3)    | 8820(2)     | 23.7(13) |
| O2W | 9243(7)   | 7614(3)    | 9438(2)     | 24.0(14) |
| O3W | 5139(6)   | 6167(3)    | 9506(2)     | 21.2(13) |
| O4W | 7506(7)   | 4977(3)    | 10144(2)    | 22.2(13) |
| O5W | 4088(6)   | 5017(3)    | 10222(2)    | 20.5(13) |
| O6W | 7016(7)   | 6933(3)    | 10336(3)    | 24.7(13) |

|      |          |         |          |          |
|------|----------|---------|----------|----------|
| O7W  | 3377(7)  | 2388(3) | 10409(3) | 28.5(15) |
| O8W  | 1240(7)  | 1439(3) | 10483(2) | 25.2(14) |
| O9W  | -2076(7) | 1323(3) | 9920(3)  | 26.2(14) |
| O10W | 7593(6)  | 1948(3) | 6320(2)  | 21.8(13) |
| O11W | 7494(7)  | 4163(3) | 6350(2)  | 22.6(13) |
| O12W | 2842(13) | 2438(5) | 6609(4)  | 81(3)    |
| O13W | 4927(7)  | 2774(3) | 5812(3)  | 25.4(14) |
| O14W | 3415(6)  | 3645(3) | 5097(3)  | 22.8(13) |

Table 3 Anisotropic Displacement Parameters ( $\text{\AA}^2 \times 10^3$ ) for FIN. The Anisotropic displacement factor exponent takes the form:  $-2\pi^2[h^2a^{*2}U_{11}+2hka^*b^*U_{12}+\dots]$ .

| Atom | $U_{11}$ | $U_{22}$ | $U_{33}$ | $U_{23}$ | $U_{13}$ | $U_{12}$ |
|------|----------|----------|----------|----------|----------|----------|
| P1   | 15.5(10) | 16.2(10) | 8.9(9)   | -0.6(7)  | 0.1(8)   | -0.8(9)  |
| O1   | 16(3)    | 17(3)    | 17(3)    | 3(2)     | -3(2)    | -3(2)    |
| O2   | 39(4)    | 20(3)    | 17(3)    | 0(2)     | 12(3)    | 7(3)     |
| O3   | 19(3)    | 23(3)    | 14(3)    | 2(2)     | -3(2)    | -1(3)    |
| O4   | 16(3)    | 27(3)    | 11(3)    | -2(2)    | 0(2)     | 4(3)     |
| O5   | 17(3)    | 26(3)    | 6(2)     | 0.5(19)  | 3(2)     | 2(3)     |
| O6   | 16(3)    | 25(3)    | 14(3)    | 1(2)     | 1(2)     | -3(3)    |
| O7   | 22(3)    | 19(3)    | 14(3)    | -2(2)    | 0(2)     | -3(3)    |
| O8   | 21(3)    | 24(3)    | 9(3)     | -3(2)    | 2(2)     | -2(3)    |
| N1   | 22(4)    | 15(3)    | 15(3)    | 0(2)     | 4(3)     | 2(3)     |
| N2   | 40(4)    | 16(4)    | 15(4)    | 3(3)     | 3(3)     | 2(4)     |
| N3   | 16(3)    | 19(4)    | 14(3)    | 1(3)     | 0(3)     | 4(3)     |
| N4   | 21(4)    | 22(4)    | 9(3)     | 0(2)     | -1(3)    | 1(3)     |
| N5   | 43(5)    | 23(4)    | 12(3)    | 2(3)     | 6(3)     | 6(4)     |
| C1   | 31(5)    | 22(5)    | 14(4)    | 5(3)     | -1(4)    | 1(4)     |
| C2   | 18(4)    | 25(4)    | 6(3)     | -4(3)    | 6(3)     | -3(4)    |
| C3   | 18(4)    | 21(4)    | 23(4)    | -3(3)    | 4(4)     | 1(4)     |
| C4   | 17(4)    | 14(4)    | 14(4)    | -1(3)    | 1(3)     | 1(3)     |
| C5   | 22(4)    | 16(4)    | 12(4)    | 0(3)     | 4(3)     | 1(4)     |
| C6   | 16(4)    | 16(4)    | 10(3)    | 1(3)     | -2(3)    | 5(4)     |
| C7   | 19(4)    | 26(4)    | 5(3)     | 1(3)     | 0(3)     | 1(4)     |
| C8   | 24(4)    | 23(4)    | 3(3)     | -2(3)    | -2(3)    | -2(4)    |
| C9   | 21(4)    | 17(4)    | 11(4)    | -1(3)    | 4(3)     | 2(4)     |
| C10  | 20(4)    | 15(4)    | 14(4)    | 3(3)     | -2(3)    | 2(4)     |
| P2   | 15.4(10) | 18.8(11) | 8.1(9)   | -0.7(7)  | -0.1(8)  | 1.1(9)   |
| O21  | 20(3)    | 16(3)    | 17(3)    | 1(2)     | 3(2)     | 0(3)     |
| O22  | 34(4)    | 20(3)    | 21(3)    | -1(2)    | -6(3)    | -8(3)    |
| O23  | 21(3)    | 26(3)    | 13(3)    | -4(2)    | 3(2)     | 2(3)     |
| O24  | 26(3)    | 32(3)    | 11(3)    | -3(2)    | 0(2)     | -12(3)   |
| O25  | 16(3)    | 23(3)    | 3(2)     | 0.9(18)  | -1(2)    | -1(2)    |
| O26  | 13(3)    | 27(3)    | 9(3)     | 1(2)     | 1(2)     | 0(3)     |
| O27  | 20(3)    | 19(3)    | 15(3)    | -2(2)    | 0(2)     | 2(3)     |
| O28  | 21(3)    | 23(3)    | 7(3)     | -2(2)    | -1(2)    | -1(3)    |
| N24  | 21(4)    | 17(4)    | 13(3)    | 0(2)     | 1(3)     | -2(3)    |
| N31  | 19(3)    | 18(3)    | 8(3)     | 2(2)     | -1(3)    | -4(3)    |
| N38  | 19(3)    | 20(4)    | 10(3)    | 2(2)     | -1(3)    | -2(3)    |

|      |          |          |          |          |          |          |
|------|----------|----------|----------|----------|----------|----------|
| N44  | 34(4)    | 27(4)    | 11(3)    | 6(3)     | -5(3)    | -1(4)    |
| N53  | 28(4)    | 19(4)    | 12(3)    | 5(2)     | -4(3)    | -5(3)    |
| C21  | 32(5)    | 22(4)    | 7(4)     | 3(3)     | -2(4)    | -1(4)    |
| C22  | 18(4)    | 24(4)    | 5(3)     | 1(3)     | 0(3)     | 5(4)     |
| C23  | 18(4)    | 22(4)    | 13(4)    | -4(3)    | 1(3)     | -2(4)    |
| C24  | 11(4)    | 25(4)    | 14(4)    | -2(3)    | -4(3)    | 4(4)     |
| C25  | 11(4)    | 20(4)    | 11(4)    | -1(3)    | 0(3)     | -6(4)    |
| C26  | 14(4)    | 22(4)    | 8(3)     | 0(3)     | 3(3)     | -6(4)    |
| C27  | 13(4)    | 21(4)    | 9(4)     | -2(3)    | 2(3)     | 0(4)     |
| C28  | 31(5)    | 19(4)    | 9(4)     | 2(3)     | -2(3)    | 3(4)     |
| C29  | 13(4)    | 17(4)    | 12(4)    | 1(3)     | 0(3)     | -4(3)    |
| C30  | 21(4)    | 21(4)    | 9(4)     | 4(3)     | 1(3)     | -2(4)    |
| Na1  | 22.8(17) | 26.4(18) | 11.8(15) | -1.2(12) | -1.1(14) | 0.5(16)  |
| Na2  | 22.0(17) | 22.6(17) | 13.5(16) | -0.1(12) | 0.7(13)  | -0.4(15) |
| Na3  | 24.3(17) | 23.4(18) | 9.2(15)  | -0.3(11) | 0.5(13)  | 1.0(16)  |
| Na4  | 29.3(18) | 29.3(19) | 10.1(15) | -0.9(12) | 1.7(14)  | 4.4(17)  |
| O1W  | 31(3)    | 25(3)    | 14(3)    | -2(2)    | 0(3)     | 3(3)     |
| O2W  | 35(4)    | 22(3)    | 15(3)    | -2(2)    | -2(3)    | 3(3)     |
| O3W  | 22(3)    | 28(3)    | 13(3)    | -1(2)    | 0(2)     | -1(3)    |
| O4W  | 24(3)    | 38(4)    | 6(3)     | 4(2)     | 1(2)     | 1(3)     |
| O5W  | 20(3)    | 26(3)    | 15(3)    | 2(2)     | -3(2)    | 3(3)     |
| O6W  | 29(3)    | 33(3)    | 12(3)    | 1(2)     | -6(3)    | -9(3)    |
| O7W  | 34(4)    | 31(4)    | 21(3)    | 4(2)     | -2(3)    | 0(3)     |
| O8W  | 30(3)    | 33(4)    | 12(3)    | 1(2)     | -5(3)    | -5(3)    |
| O9W  | 35(4)    | 29(3)    | 15(3)    | -2(2)    | 3(3)     | -2(3)    |
| O10W | 28(3)    | 26(3)    | 12(3)    | 0(2)     | 1(2)     | 0(3)     |
| O11W | 29(3)    | 27(3)    | 11(3)    | 1(2)     | -3(3)    | 4(3)     |
| O12W | 99(8)    | 102(8)   | 43(6)    | 1(5)     | -6(6)    | -1(7)    |
| O13W | 28(3)    | 32(4)    | 17(3)    | 5(2)     | 2(3)     | 9(3)     |
| O14W | 31(3)    | 26(3)    | 12(3)    | -2(2)    | 2(3)     | -1(3)    |

Table 4 Bond Lengths for FIN.

| Atom | Atom | Length/Å  | Atom | Atom | Length/Å  |
|------|------|-----------|------|------|-----------|
| P1   | O5   | 1.633(5)  | P2   | O25  | 1.612(5)  |
| P1   | O6   | 1.504(6)  | P2   | O26  | 1.498(6)  |
| P1   | O7   | 1.511(6)  | P2   | O27  | 1.521(6)  |
| P1   | O8   | 1.517(6)  | P2   | O28  | 1.509(6)  |
| O1   | C6   | 1.425(9)  | O21  | C26  | 1.434(9)  |
| O1   | C9   | 1.439(9)  | O21  | C29  | 1.447(9)  |
| O2   | C3   | 1.245(10) | O22  | C23  | 1.234(10) |
| O3   | C7   | 1.417(9)  | O23  | C27  | 1.414(9)  |
| O4   | C8   | 1.440(9)  | O24  | C28  | 1.408(9)  |
| O5   | C10  | 1.434(10) | O25  | C30  | 1.434(9)  |
| N1   | C1   | 1.371(10) | N24  | C24  | 1.316(10) |
| N1   | C5   | 1.376(10) | N24  | C25  | 1.360(10) |
| N1   | C6   | 1.448(10) | N31  | C21  | 1.385(10) |
| N2   | C1   | 1.293(11) | N31  | C25  | 1.374(10) |
| N2   | C2   | 1.394(10) | N31  | C26  | 1.448(10) |

|    |     |           |     |     |           |
|----|-----|-----------|-----|-----|-----------|
| N3 | C3  | 1.392(10) | N38 | C23 | 1.401(10) |
| N3 | C4  | 1.392(10) | N38 | C24 | 1.379(10) |
| N4 | C4  | 1.305(10) | N44 | C24 | 1.356(10) |
| N4 | C5  | 1.355(10) | N53 | C21 | 1.298(10) |
| N5 | C4  | 1.346(10) | N53 | C22 | 1.384(9)  |
| C2 | C3  | 1.389(12) | C22 | C23 | 1.404(12) |
| C2 | C5  | 1.405(10) | C22 | C25 | 1.388(10) |
| C6 | C7  | 1.537(11) | C26 | C27 | 1.534(11) |
| C7 | C8  | 1.503(11) | C27 | C28 | 1.515(11) |
| C8 | C9  | 1.536(11) | C28 | C29 | 1.543(11) |
| C9 | C10 | 1.520(10) | C29 | C30 | 1.513(10) |

Table 5 Bond Angles for FIN.

| Atom | Atom | Atom | Angle/°  | Atom | Atom | Atom | Angle/°  |
|------|------|------|----------|------|------|------|----------|
| O6   | P1   | O5   | 103.5(3) | O26  | P2   | O25  | 103.5(3) |
| O6   | P1   | O7   | 113.2(3) | O26  | P2   | O27  | 113.3(3) |
| O6   | P1   | O8   | 113.3(3) | O26  | P2   | O28  | 113.0(3) |
| O7   | P1   | O5   | 108.1(3) | O27  | P2   | O25  | 106.8(3) |
| O7   | P1   | O8   | 111.9(3) | O28  | P2   | O25  | 106.7(3) |
| O8   | P1   | O5   | 106.1(3) | O28  | P2   | O27  | 112.7(3) |
| C6   | O1   | C9   | 110.8(6) | C26  | O21  | C29  | 109.9(6) |
| C10  | O5   | P1   | 116.2(5) | C30  | O25  | P2   | 115.5(4) |
| C1   | N1   | C5   | 105.9(6) | C24  | N24  | C25  | 111.3(7) |
| C1   | N1   | C6   | 126.5(7) | C21  | N31  | C26  | 127.6(6) |
| C5   | N1   | C6   | 127.6(7) | C25  | N31  | C21  | 105.6(6) |
| C1   | N2   | C2   | 104.3(7) | C25  | N31  | C26  | 126.8(6) |
| C3   | N3   | C4   | 124.3(7) | C24  | N38  | C23  | 124.8(7) |
| C4   | N4   | C5   | 111.9(7) | C21  | N53  | C22  | 104.7(7) |
| N2   | C1   | N1   | 114.6(7) | N53  | C21  | N31  | 113.5(7) |
| N2   | C2   | C5   | 109.8(7) | N53  | C22  | C23  | 131.2(7) |
| C3   | C2   | N2   | 131.4(7) | N53  | C22  | C25  | 110.3(7) |
| C3   | C2   | C5   | 118.8(7) | C25  | C22  | C23  | 118.4(7) |
| O2   | C3   | N3   | 117.4(7) | O22  | C23  | N38  | 118.4(7) |
| O2   | C3   | C2   | 130.2(8) | O22  | C23  | C22  | 129.6(8) |
| C2   | C3   | N3   | 112.4(7) | N38  | C23  | C22  | 111.9(7) |
| N4   | C4   | N3   | 124.3(7) | N24  | C24  | N38  | 124.2(7) |
| N4   | C4   | N5   | 121.1(7) | N24  | C24  | N44  | 119.6(7) |
| N5   | C4   | N3   | 114.6(7) | N44  | C24  | N38  | 116.2(7) |
| N1   | C5   | C2   | 105.3(7) | N24  | C25  | N31  | 125.0(7) |
| N4   | C5   | N1   | 126.6(7) | N24  | C25  | C22  | 129.1(7) |
| N4   | C5   | C2   | 128.1(8) | N31  | C25  | C22  | 105.9(6) |
| O1   | C6   | N1   | 107.8(6) | O21  | C26  | N31  | 107.5(6) |
| O1   | C6   | C7   | 105.5(6) | O21  | C26  | C27  | 105.4(6) |
| N1   | C6   | C7   | 114.0(6) | N31  | C26  | C27  | 114.5(6) |
| O3   | C7   | C6   | 108.7(6) | O23  | C27  | C26  | 108.3(6) |
| O3   | C7   | C8   | 116.3(6) | O23  | C27  | C28  | 114.8(6) |
| C8   | C7   | C6   | 102.9(6) | C28  | C27  | C26  | 101.9(6) |
| O4   | C8   | C7   | 108.2(6) | O24  | C28  | C27  | 107.9(6) |

|     |     |     |          |     |     |     |          |
|-----|-----|-----|----------|-----|-----|-----|----------|
| O4  | C8  | C9  | 111.6(6) | O24 | C28 | C29 | 111.2(7) |
| C7  | C8  | C9  | 102.9(6) | C27 | C28 | C29 | 102.5(6) |
| O1  | C9  | C8  | 106.0(6) | O21 | C29 | C28 | 106.0(6) |
| O1  | C9  | C10 | 110.4(6) | O21 | C29 | C30 | 110.0(6) |
| C10 | C9  | C8  | 115.2(7) | C30 | C29 | C28 | 115.9(7) |
| O5  | C10 | C9  | 112.5(6) | O25 | C30 | C29 | 111.4(6) |

Table 6 Hydrogen Bonds for FIN.

| <b>D</b> | <b>H</b> | <b>A</b>          | <b>d(D-H)/Å</b> | <b>d(H-A)/Å</b> | <b>d(D-A)/Å</b> | <b>D-H-A/°</b> |
|----------|----------|-------------------|-----------------|-----------------|-----------------|----------------|
| O3       | H3       | O28               | 1.08(8)         | 1.78(8)         | 2.727(8)        | 144(6)         |
| O4       | H4       | O26 <sup>1</sup>  | 0.82            | 1.91            | 2.725(8)        | 173.4          |
| N3       | H3A      | O8 <sup>2</sup>   | 0.91(9)         | 1.82(9)         | 2.717(9)        | 168(8)         |
| N5       | H5B      | O7W               | 0.77            | 2.13            | 2.899(10)       | 177.4          |
| C6       | H6       | N4                | 0.98            | 2.69            | 3.067(10)       | 103.4          |
| O23      | H23      | O8 <sup>3</sup>   | 0.82            | 1.97            | 2.723(8)        | 152.5          |
| O24      | H24      | O6                | 0.82            | 1.88            | 2.660(8)        | 157.3          |
| N38      | H38      | O28 <sup>4</sup>  | 0.86            | 1.91            | 2.766(8)        | 170.7          |
| N44      | H44A     | O9W <sup>5</sup>  | 0.85            | 2.05            | 2.904(10)       | 174.9          |
| C26      | H26      | N24               | 0.98            | 2.63            | 3.022(10)       | 104.2          |
| C30      | H30A     | O27               | 0.97            | 2.69            | 3.080(9)        | 104.6          |
| O1W      | H1WA     | N53               | 0.85            | 2.22            | 3.017(9)        | 155.4          |
| O1W      | H1WB     | O7 <sup>6</sup>   | 0.85            | 1.90            | 2.699(8)        | 156.5          |
| O2W      | H2WA     | O27               | 0.85            | 1.93            | 2.774(8)        | 172.4          |
| O2W      | H2WB     | O1W               | 0.85            | 2.08            | 2.778(8)        | 138.7          |
| O2W      | H2WB     | O12W <sup>6</sup> | 0.85            | 2.54            | 3.019(12)       | 116.9          |
| O3W      | H3WA     | O4                | 0.85            | 2.16            | 2.913(8)        | 147.9          |
| O3W      | H3WB     | O27               | 0.85            | 1.93            | 2.766(8)        | 170.1          |
| O4W      | H4WA     | O6 <sup>7</sup>   | 0.85            | 2.01            | 2.837(8)        | 162.5          |
| O4W      | H4WB     | O28               | 0.85            | 1.94            | 2.762(7)        | 162.5          |
| O5W      | H5WA     | O4W               | 0.85            | 2.34            | 3.087(8)        | 147.4          |
| O5W      | H5WB     | O4                | 0.85            | 2.22            | 3.059(8)        | 168.9          |
| O5W      | H5WB     | O3W               | 0.85            | 2.61            | 3.068(8)        | 115.0          |
| O6W      | H6WA     | O27               | 0.85            | 2.25            | 2.957(8)        | 140.8          |
| O6W      | H6WA     | O3W               | 0.85            | 2.28            | 2.987(8)        | 141.0          |
| O6W      | H6WB     | O13W <sup>7</sup> | 0.85            | 2.67            | 3.018(9)        | 106.0          |
| O7W      | H7WA     | O8W               | 0.85            | 1.94            | 2.793(9)        | 175.3          |
| O7W      | H7WB     | N24 <sup>7</sup>  | 0.85            | 2.25            | 3.043(9)        | 156.4          |
| O8W      | H8WB     | O3 <sup>8</sup>   | 0.85            | 2.28            | 2.827(8)        | 122.2          |
| O9W      | H9WA     | O8 <sup>9</sup>   | 0.85            | 2.01            | 2.842(8)        | 167.1          |
| O9W      | H9WA     | O23 <sup>2</sup>  | 0.85            | 2.51            | 3.022(8)        | 119.7          |
| O9W      | H9WB     | O7W <sup>8</sup>  | 0.85            | 2.05            | 2.866(8)        | 160.3          |
| O10W     | H10C     | O26 <sup>10</sup> | 0.85            | 1.91            | 2.745(8)        | 168.3          |
| O10W     | H10D     | O2                | 0.85            | 1.89            | 2.716(8)        | 165.2          |
| O11W     | H11A     | O6                | 0.86            | 1.86            | 2.710(8)        | 168.1          |
| O11W     | H11B     | O22 <sup>10</sup> | 1.03            | 1.76            | 2.773(8)        | 166.3          |
| O12W     | H12A     | O27 <sup>2</sup>  | 0.85            | 2.17            | 2.796(12)       | 130.0          |
| O12W     | H12B     | N2                | 0.84            | 2.40            | 3.139(14)       | 147.2          |
| O13W     | H13A     | O12W              | 0.85            | 1.87            | 2.682(12)       | 160.7          |

|      |      |                   |      |      |          |       |
|------|------|-------------------|------|------|----------|-------|
| O13W | H13B | O14W              | 0.85 | 2.06 | 2.798(8) | 144.5 |
| O14W | H14A | O26 <sup>11</sup> | 0.85 | 2.05 | 2.766(8) | 141.8 |
| O14W | H14B | O7                | 0.85 | 2.20 | 2.840(8) | 132.0 |

<sup>1</sup>-1+X,+Y,+Z; <sup>2</sup>1-X,-1/2+Y,3/2-Z; <sup>3</sup>1+X,+Y,+Z; <sup>4</sup>2-X,1/2+Y,3/2-Z; <sup>5</sup>1/2-X,1-Y,-1/2+Z; <sup>6</sup>1-X,1/2+Y,3/2-Z; <sup>7</sup>3/2-X,1-Y,1/2+Z; <sup>8</sup>-1/2+X,1/2-Y,2-Z; <sup>9</sup>-X,-1/2+Y,3/2-Z; <sup>10</sup>2-X,-1/2+Y,3/2-Z; <sup>11</sup>3/2-X,1-Y,-1/2+Z

Table 7 Hydrogen Atom Coordinates ( $\text{\AA}\times 10^4$ ) and Isotropic Displacement Parameters ( $\text{\AA}^2\times 10^3$ ) for FIN.

| Atom | x         | y        | z        | U(eq)  |
|------|-----------|----------|----------|--------|
| H3   | 6390(90)  | 5060(40) | 8890(40) | 10(20) |
| H4   | 2350      | 5525     | 8939     | 27     |
| H3A  | 6170(100) | 1480(40) | 8490(40) | 20(20) |
| H5A  | 4945      | 1442     | 9345     | 30     |
| H5B  | 4369      | 2025     | 9616     | 30(30) |
| H1   | 4887      | 3937     | 7144     | 27     |
| H6   | 3522      | 3960     | 8697     | 17     |
| H7   | 5357      | 4735     | 7968     | 20     |
| H8   | 3991      | 5603     | 8166     | 20     |
| H9   | 1404      | 5060     | 8095     | 20     |
| H10A | 1645      | 4939     | 7052     | 20     |
| H10B | 2216      | 5602     | 7258     | 20     |
| H23  | 11216     | 6105     | 6314     | 30     |
| H24  | 7088      | 5689     | 6236     | 34     |
| H38  | 11052     | 9554     | 6432     | 19     |
| H44A | 8857      | 8943     | 5435     | 20(20) |
| H44B | 9803      | 9467     | 5578     | 0(19)  |
| H21  | 10059     | 7212     | 7975     | 24     |
| H26  | 8479      | 7099     | 6440     | 18     |
| H27  | 10323     | 6326     | 7176     | 17     |
| H28  | 8843      | 5471     | 6970     | 24     |
| H29  | 6328      | 6073     | 7077     | 17     |
| H30A | 6625      | 6180     | 8116     | 20     |
| H30B | 7109      | 5506     | 7904     | 20     |
| H1WA | 9497      | 8659     | 8479     | 36     |
| H1WB | 8421      | 9007     | 8776     | 36     |
| H2WA | 8940      | 7244     | 9358     | 36     |
| H2WB | 8772      | 7878     | 9224     | 36     |
| H3WA | 4574      | 6026     | 9232     | 32     |
| H3WB | 5976      | 6263     | 9356     | 32     |
| H4WA | 8106      | 5038     | 10433    | 33     |
| H4WB | 7932      | 5067     | 9815     | 33     |
| H5WA | 4944      | 4854     | 10256    | 31     |
| H5WB | 3931      | 5113     | 9858     | 31     |
| H6WA | 6833      | 6779     | 9992     | 37     |
| H6WB | 7402      | 7295     | 10297    | 37     |
| H7WA | 2764      | 2084     | 10425    | 43     |

|      |       |      |       |     |
|------|-------|------|-------|-----|
| H7WB | 4090  | 2318 | 10650 | 43  |
| H8WA | 397   | 1278 | 10405 | 38  |
| H8WB | 1619  | 1252 | 10783 | 38  |
| H9WA | -2294 | 1180 | 9574  | 39  |
| H9WB | -2034 | 1722 | 9906  | 39  |
| H10C | 8063  | 1619 | 6218  | 33  |
| H10D | 7134  | 1881 | 6647  | 33  |
| H11A | 6790  | 4422 | 6261  | 34  |
| H11B | 7918  | 4234 | 6776  | 34  |
| H12A | 3097  | 2077 | 6481  | 122 |
| H12B | 3293  | 2637 | 6877  | 122 |
| H13A | 4224  | 2601 | 6006  | 38  |
| H13B | 4665  | 3141 | 5705  | 38  |
| H14A | 3689  | 3573 | 4739  | 34  |
| H14B | 3571  | 4030 | 5181  | 34  |

## Experimental

### Refinement model description

Number of restraints - 15, number of constraints - unknown.

#### Details:

##### 1. Fixed Uiso

At 1.2 times of:

All C(H) groups, All C(H,H) groups, All N(H) groups

At 1.5 times of:

All O(H) groups, All O(H,H) groups

##### 2. Restrained distances

O11W-H11A = O11W-H11B = O12W-H12B

0.85 with sigma of 0.002

##### 3. Uiso/Uanis restraints and constraints

Uanis(C2)  $\approx$  Ueq, Uanis(O25)  $\approx$  Ueq: with sigma of 0.01 and sigma for terminal atoms of 0.05

##### 4. Others

Fixed Uiso: H5A(0.03)

##### 5.a Riding coordinates:

N5(H5A,H5B), N44(H44A,H44B), O1W(H1WA,H1WB), O2W(H2WA,H2WB), O3W(H3WA,H3WB), O4W(H4WA,H4WB), O5W(H5WA,H5WB), O6W(H6WA,H6WB), O7W(H7WA,H7WB), O8W(H8WA,H8WB), O9W(H9WA,H9WB), O10W(H10C,H10D), O11W(H11A,H11B), O12W(H12A,H12B), O13W(H13A,H13B), O14W(H14A,H14B)

##### 5.b Ternary CH refined with riding coordinates:

C6(H6), C7(H7), C8(H8), C9(H9), C26(H26), C27(H27), C28(H28), C29(H29)

##### 5.c Secondary CH2 refined with riding coordinates:

C10(H10A,H10B), C30(H30A,H30B)

##### 5.d Aromatic/amide H refined with riding coordinates:

C1(H1), N38(H38), C21(H21)

##### 5.e Idealised tetrahedral OH refined as rotating group:

O4(H4), O23(H23), O24(H24)

This report has been created with Olex2, compiled on 2014.01.22 svn.r2872 for OlexSys. Please [let us know](#) if there are any errors or if you would like to have additional features.
